# Supplementary material
Source: PubMed Central journal article supplement (PMC3567490)

### **Supplementary Figure Legends**

#### **Supplementary Figure S1. Methylation states on non-methylated alleles of imprinted genes in PGCs**

The methylation states in PGCs after E10.5 of the DMRs of the non-methylated alleles of one paternally (*H19*) and five maternally (*Peg3*, *Nnat*, *Peg10*, *Snrpn*, *Kcnqlot1*) imprinted genes determined by bisulfite sequence are shown. White and black circles represent un-methylated and methylated cytosine, respectively.

#### **Supplementary Figure S2. Expression of histone H3 in PGCs after E9.5**

Representative images for the expression of histone H3 (red) in PGCs (*Stella-EGFP*-positive, green) and somatic cells after E9.5. The nuclear architecture of PGCs and somatic cells is shown by DAPI staining (white). Bar, 10  $\mu$ m.

Figure. S1 S. Kagiwada et al.

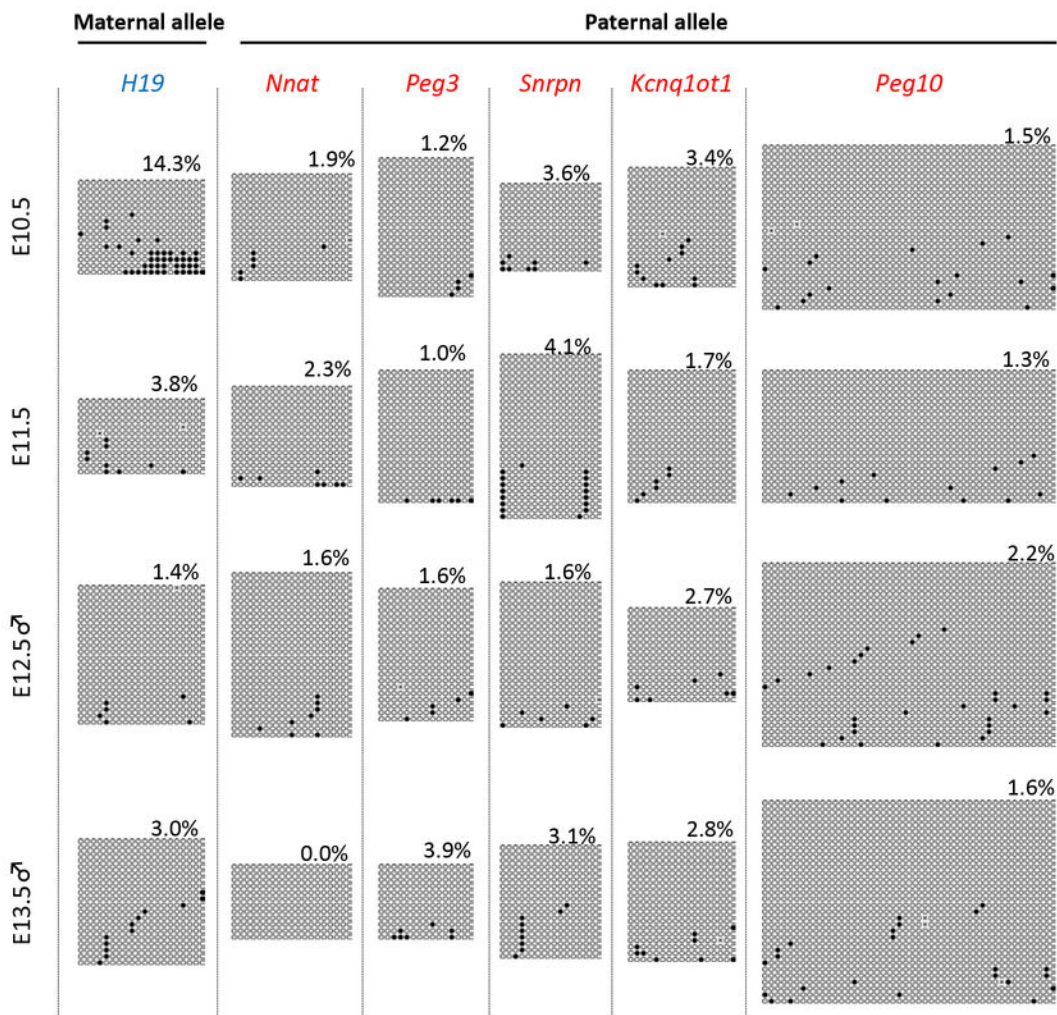

Figure. S2 S. Kagiwada et al.

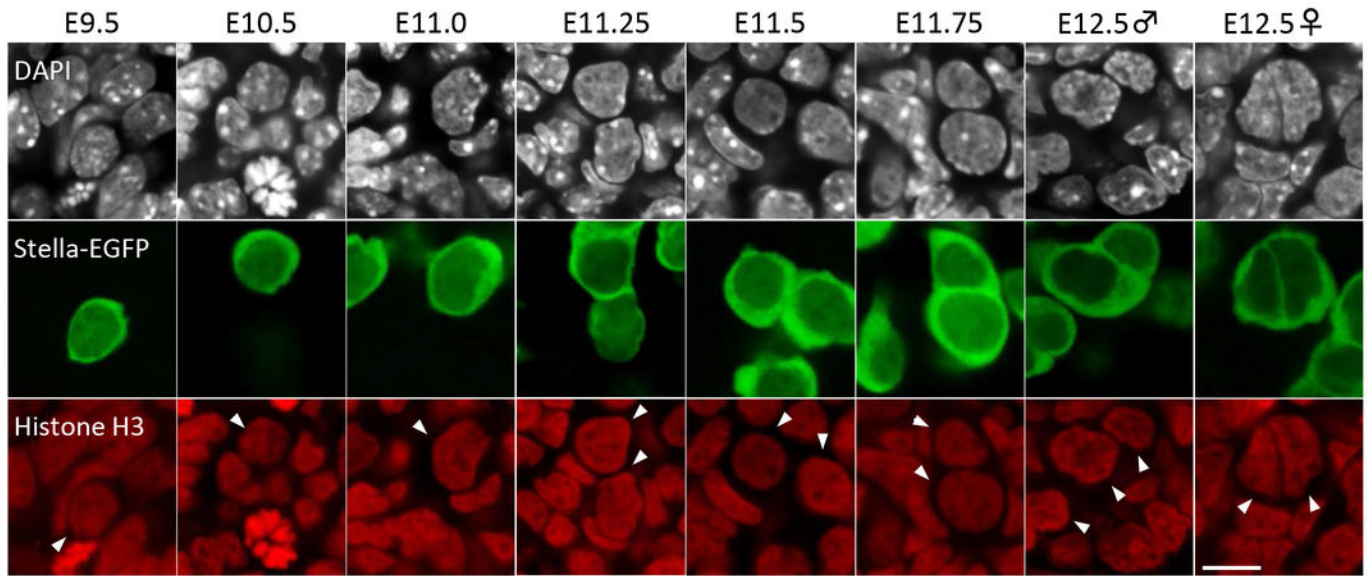

Supplement: emboj2012331s1.pdf [file emboj2012331s1.pdf]
